# Supplementary material
Source: PubMed Central journal article supplement (PMC5423216)
Supplement: MOL2-10-1450-s002.pdf [file MOL2-10-1450-s002.pdf]

|                          | <b>Patient 1</b>                | <b>Patient 2</b>                       | <b>Patient 3</b>                     |
|--------------------------|---------------------------------|----------------------------------------|--------------------------------------|
| Gender                   | Male                            | Male                                   | Female                               |
| Age at Diagnosis         | 56                              | 60                                     | 54                                   |
| Follow Up (months)       | 64                              | 21                                     | 14                                   |
| Died of Disease          | No                              | Yes                                    | Yes                                  |
| <b>Cystectomy</b>        |                                 |                                        |                                      |
| Time of Cystectomy       | 2006                            | 2006                                   | 2006                                 |
| Primary Treatment        | Cystectomy +<br>Lymphadenectomy | Cystectomy +<br>Lymphadenectomy        | Cystectomy +<br>Lymphadenectomy      |
| T Stage                  | 3a                              | 4a                                     | 1b                                   |
| Grade                    | III                             | IV                                     | III                                  |
| Focality                 | Uni-focal                       | Uni-focal                              | Multi-Focal                          |
| Type (Tumour)            | FF                              | FFPE                                   | FF                                   |
| N status                 | 1                               | 1                                      | 1                                    |
| Type (Lymph Node)        | FF                              | FF                                     | FF                                   |
| <b>Relapse</b>           |                                 |                                        |                                      |
| Time of Relapse          | -                               | 2007                                   | 2006                                 |
| M status                 | 0                               | Small Intestine                        | Lung                                 |
| Time to Relapse (months) | -                               | 8                                      | 3                                    |
| Treatment                | -                               | Gastrectomy +<br>Cisplatin/Gemcitabine | Lobectomy +<br>Cisplatin/Gemcitabine |
| Type (Metastasis)        | -                               | FFPE                                   | FFPE                                 |
| <b>Exomes</b>            |                                 |                                        |                                      |
| Germline                 | Blood                           | Blood                                  | Adj. Normal (FF)                     |
| # of Exomes              | 10                              | 9                                      | 8                                    |

**Supplementary Table S1** - Clinical and pathological information. Tumours were classified according to the TNM classification (T: Tumour, N: Lymph node, M: Metastasis) and graded according to the Bergkvist grading system. FF: Fresh frozen, FFPE: Formalin-fixed paraffin embedded.
