# Supplementary material
Source: PubMed Central journal article supplement (PMC5423216)
Supplement: MOL2-10-1450-s003.pdf [file MOL2-10-1450-s003.pdf]

**Patient 1**

| Gene     | Nucleotide Change | Amino Acid Change | Alteration                 | Samples Affected                          | Examples of FDA Approved Drugs for other Cancers | Examples of Drugs in Potential Clinical Trials                                                                                                                                                                                                                                                         |
|----------|-------------------|-------------------|----------------------------|-------------------------------------------|--------------------------------------------------|--------------------------------------------------------------------------------------------------------------------------------------------------------------------------------------------------------------------------------------------------------------------------------------------------------|
| PSMD1    | c.1291A>G         | p.T431A           | Missense                   | Tumor Reg 1-8                             | Bortezomib<br>Carfilzomib                        | -                                                                                                                                                                                                                                                                                                      |
| PIK3CA   | c.1633G>A         | p.E545K           | Missense, Activating       | Tumor Reg 1-8                             | Everolimus<br>Temozolomide<br>Sunitinib          | Palbociclib (CDK4/6 inhibitor) + Taselisib/Pictilisib (PI3K inhibitors) (NCT02389842) VS-55844 (PI3K/mTOR inhibitor) (NCT01991938)                                                                                                                                                                     |
| PSMC6    | c.326G>C          | p.G109A           | Missense, Loss of function | Tumor Reg 1-8                             | Bortezomib<br>Carfilzomib                        | -<br><br>AZD1775 (Wee-1 inhibitor) + Chemotherapy (NCT02272790)<br>MK1775 (Wee-1 inhibitor) + Carboplatin (NCT01164995)                                                                                                                                                                                |
| TP53     | c.839G>C          | p.R280T           | Missense, Loss of function | Tumor Reg 1-8                             | -                                                | MLN9708 (proteasome inhibitor) and Vorinostat (NCT02042989)<br>p53MVA vaccine (NCT02275039)                                                                                                                                                                                                            |
| HSP90AB1 | c.1376C>T         | p.T459I           | Missense, Inactivating     | Tumor Reg 1-5, Tumor Reg 7-8              | -                                                | Ganetespib (Hsp90 inhibitor) + Sirolimus (mTOR inhibitor) (NCT02008877)<br>SNX-5422 (Hsp90 inhibitor) + Carboplatin + Paclitaxel (NCT01892046)<br>PU-H71 (Hsp90 inhibitor) (NCT01393509)<br>SNX-5422 (Hsp90 inhibitor) + Everolimus (NCT02063958)<br>SNX-5422 Mesylate (Hsp90 inhibitor) (NCT01635712) |
| GHR      | c.1072G>C         | p.E358Q           | Missense                   | Tumor Reg 1, Tumor Reg 3-5, Tumor Reg 7-8 | Pegvisomant                                      | -                                                                                                                                                                                                                                                                                                      |

**Patient 2**

| Gene    | Nucleotide Change      | Amino Acid Change  | Alteration                             | Samples Affected                                                                 | Examples of FDA Approved Drugs for other Cancers                                                                                            | Examples of Drugs in Potential Clinical Trials                                                                          |
|---------|------------------------|--------------------|----------------------------------------|----------------------------------------------------------------------------------|---------------------------------------------------------------------------------------------------------------------------------------------|-------------------------------------------------------------------------------------------------------------------------|
| FH      | c.1040C>T              | p.S374F            | Missense, Inactivating                 | Tumor Reg A-C, Lymph Node, Dist. Met Reg A-B                                     | -                                                                                                                                           | Glutaminase Inhibitor (NCT02071862)                                                                                     |
| NCOA1   | c.2269G>A<br>c.2404G>A | p.E757K<br>p.E802K | Missense, Loss of function<br>Missense | Tumor Reg A-C, Lymph Node, Dist. Met Reg A-B<br>Tumor Reg A-C, Dist. Met Reg A-B | Tamoxifen                                                                                                                                   | -                                                                                                                       |
| SMARCB1 | c.127C>G               | p.L43V             | Missense, Loss of function             | Tumor Reg A-C, Lymph Node, Dist. Met Reg A                                       | Vismodegib                                                                                                                                  | Alisertib (NCT02114229)                                                                                                 |
| PSMB4   | c.562G>T               | p.A188S            | Missense                               | Tumor Reg A-C, Dist. Met Reg A-B                                                 | Bortezomib<br>Carfilzomib                                                                                                                   | -                                                                                                                       |
| PDGFRA  | c.1232C>G              | p.T411S            | Missense, Loss of function             | Tumor Reg A-C, Dist. Met Reg A-B                                                 | Imatinib<br>Regorafenib<br>Pazopanib<br>Sunitinib<br>Ponatinib<br>Nilotinib<br>Axitinib<br>Lenvatinib<br>Axitinib<br>Dasatinib<br>Sorafenib | Nintedanib (VEGFR and PDGFR inhibitor) (NCT01788982)<br>Famitinib (c-KIT, VEGFR, PDGFR, FLT1+3 inhibitor) (NCT01762293) |
| DDR2    | c.813C>G<br>c.843C>G   | p.I271M<br>p.F281L | Missense<br>Missense, Loss of function | Tumor Reg A-C, Dist. Met Reg A<br>Tumor Reg A-B, Dist. Met Reg A                 | Regorafenib                                                                                                                                 | Dasatinib + Crizotinib (NCT01744652)<br>MGCD516 (RTK inhibitor) (NCT02219711)                                           |

**Patient 3**

| Gene  | Nucleotide Change | Amino Acid Change | Alteration                 | Samples Affected                                   | Examples of FDA Approved Drugs for other Cancers                                                        | Examples of Drugs in Potential Clinical Trials                                                                                                                                          |
|-------|-------------------|-------------------|----------------------------|----------------------------------------------------|---------------------------------------------------------------------------------------------------------|-----------------------------------------------------------------------------------------------------------------------------------------------------------------------------------------|
| BTK   | c.1879T>C         | p.R594C           | Missense, Loss of function | Tumor Reg A, Lymph Node Reg A-B, Dist. Met Reg A-B | Ibrutinib                                                                                               | ACP-196 (BTK inhibitor) (NCT02029443)<br>ACP-196 + ACP-319 (PI3K inhibitor) (NCT02328014)                                                                                               |
| FGF13 | c.70G>C           | p.G24R            | Missense, Loss of function | Tumor Reg A, Lymph Node Reg A-B, Dist. Met Reg A-B | -                                                                                                       | TAS-120 (FGFR inhibitor) (NCT02052778)                                                                                                                                                  |
| EPHB1 | c.1459C>G         | p.Q487E           | Missense                   | Tumor Reg A                                        | Ponatinib                                                                                               | -                                                                                                                                                                                       |
| EPHA8 | c.2378A>G         | p.Y793C           | Missense, Inactivating     | Lymph Node Reg A-B, Dist. Met Reg A-B              | Ponatinib                                                                                               | -                                                                                                                                                                                       |
| PSMC2 | c.441C>G          | p.Q148E           | Missense                   | Lymph Node Reg A                                   | Bortezomib<br>Carfilzomib                                                                               | -                                                                                                                                                                                       |
| BRCA2 | c.2290G>A         | p.E764K           | Missense                   | Lymph Node Reg B                                   | Olaparib                                                                                                | Olaparib + AZD2014 (mTORC1/2 inhibitor) or AZD5363 (AKT inhibitor) (NCT02208375)<br>Rucaparib (PARP inhibitor) (NCT01891344)<br>Talazoparib (PARP inhibitor) (NCT02326844; NCT02286687) |
| FGFR2 | c.2131G>C         | p.E711Q           | Missense                   | Dist. Met Reg A-B                                  | Pazopanib<br>Regorafenib<br>Sunitinib<br>Lenvatinib<br>Ponatinib                                        | Lucitanib (FGFR1-3, VEGFR1-3 and PDGFR a/b inhibitor) (NCT02109016)<br>BGJ398 (pan-FGFR inhibitor) (NCT02150967)                                                                        |
| MMP1  | c.1056G>C         | p.Q352H           | Missense, Inactivating     | Dist. Met Reg A-B                                  | Marimastat                                                                                              | -                                                                                                                                                                                       |
| KIT   | c.157G>C          | p.E53K            | Missense                   | Dist. Met Reg A-B                                  | Axitinib<br>Cabozantinib<br>Dasatinib<br>Imatinib<br>Pazopanib<br>Regorafenib<br>Sorafenib<br>Sunitinib | Midostaurin (c-KIT inhibitor) (NCT01830361)                                                                                                                                             |
| ATM   | c.8315G>A         | p.G2772E          | Missense                   | Dist. Met Reg A                                    | Olaparib                                                                                                | Talazoparib (PARP inhibitor) (NCT02286687)<br>MSC2490484A (DNA-PK inhibitor) (NCT02316197)                                                                                              |

**Supplementary Table S2** - Potential therapeutic targets. Listed for each patient are all altered genes that are potential targets identified by search in the Drug-Gene Interaction database (DGIdb), the Target database, the IntOGen database, the Personalized Cancer Medicine database, and by use of Qiagen Clinical Insight software. The gene altered, the observed alteration at nucleotide and protein level, the alteration, the samples affected, examples of identified FDA approved drugs (approved for other cancers), and examples of drugs in potential clinical trials are listed (derived from Qiagen Clinical Insight). Additionally, tumour suppressor genes, oncogenes, or IntOGen driver genes are highlighted in blue, red, and green text, respectively. All FDA approved drugs for the given target are listed (identified by the DrugBank database, the Personalized Cancer Medicine database, or by the Qiagen Clinical Insight software).
