# Supplementary material
Source: PubMed Central journal article supplement (PMC5423216)
Supplement: MOL2-10-1450-s006.pdf [file MOL2-10-1450-s006.pdf]

## Supplementary Figure S3

Patient 3 Primary Tumour

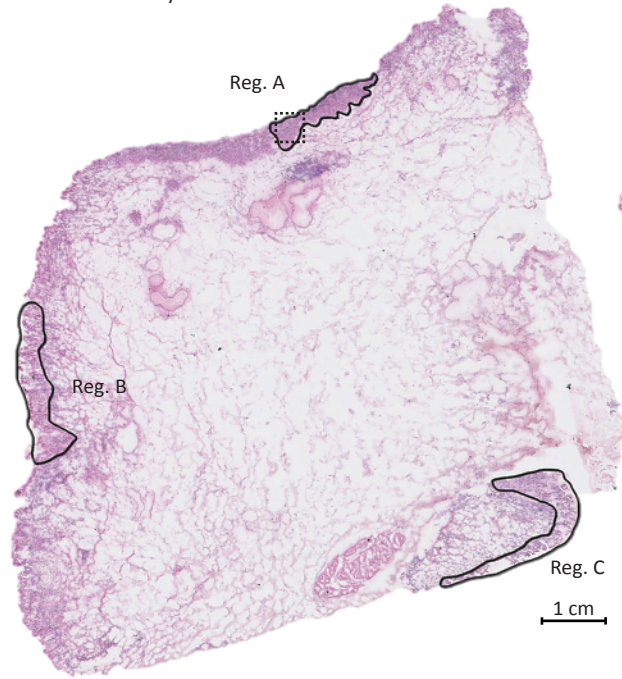

Patient 3 Lymph Node Metastasis

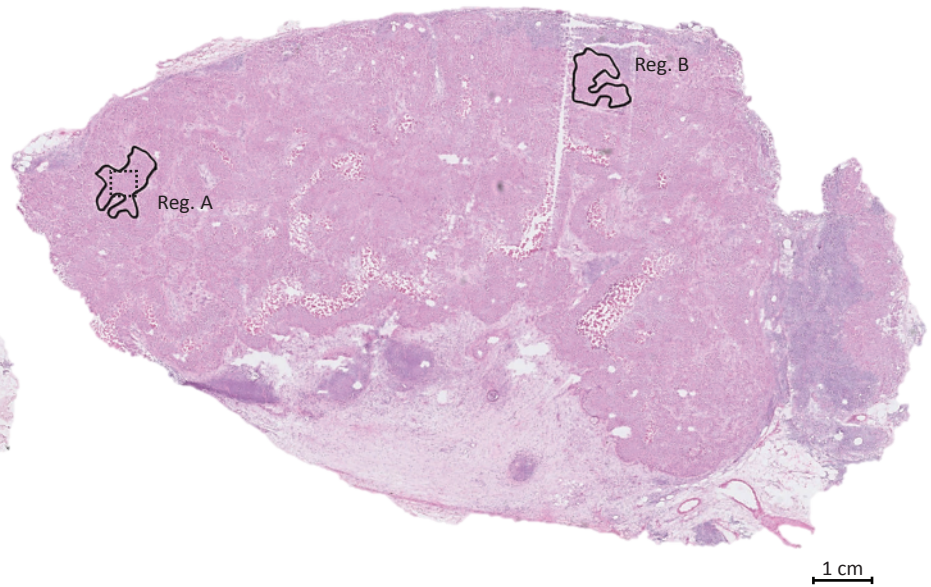

Patient 3 Distant Metastasis - Lung

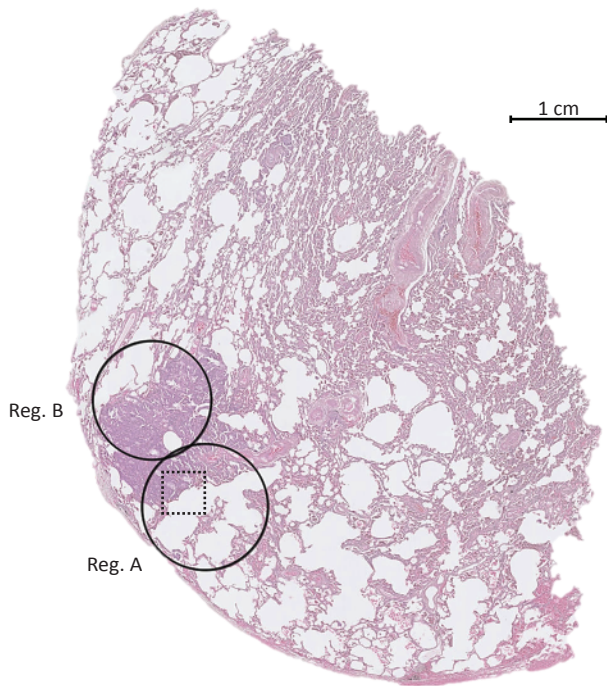

Primary Tumour

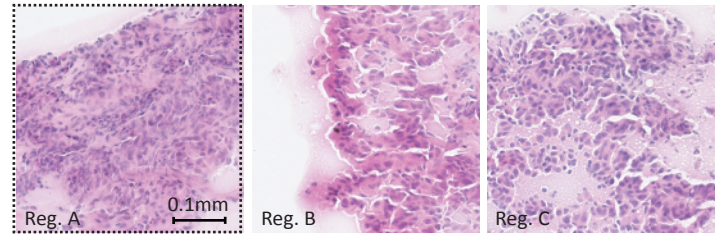

Lymph Node Metastasis

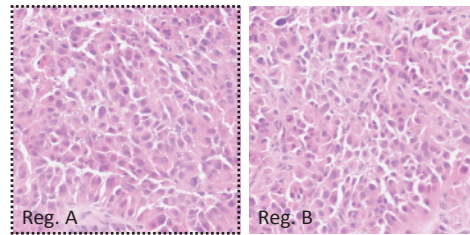

Distant Metastasis

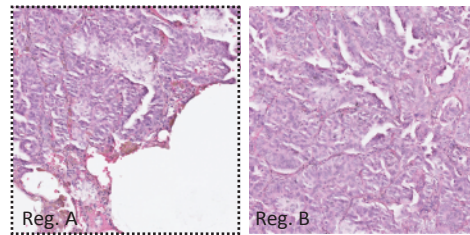

**Supplementary Figure S3 - Laser micro dissection overview – Patient 3.** Presented is the primary tumour (FF), the lymph node metastasis (FF), and distant metastasis (FFPE) in the lung from patient 3. For FFPE samples, small cellular regions were obtained by punctures indicated by circles whereas for FF samples, regions were procured by laser micro dissections. Images of each subpopulation at 40x magnification are presented and a box placed in region A in each sample for comparison. Scalebars are indicated in macro-figures.
