# Supplementary material
Source: PubMed Central journal article supplement (PMC5423216)
Supplement: MOL2-10-1450-s008.pdf [file MOL2-10-1450-s008.pdf]

## Supplementary Figure S5

### Patient 1

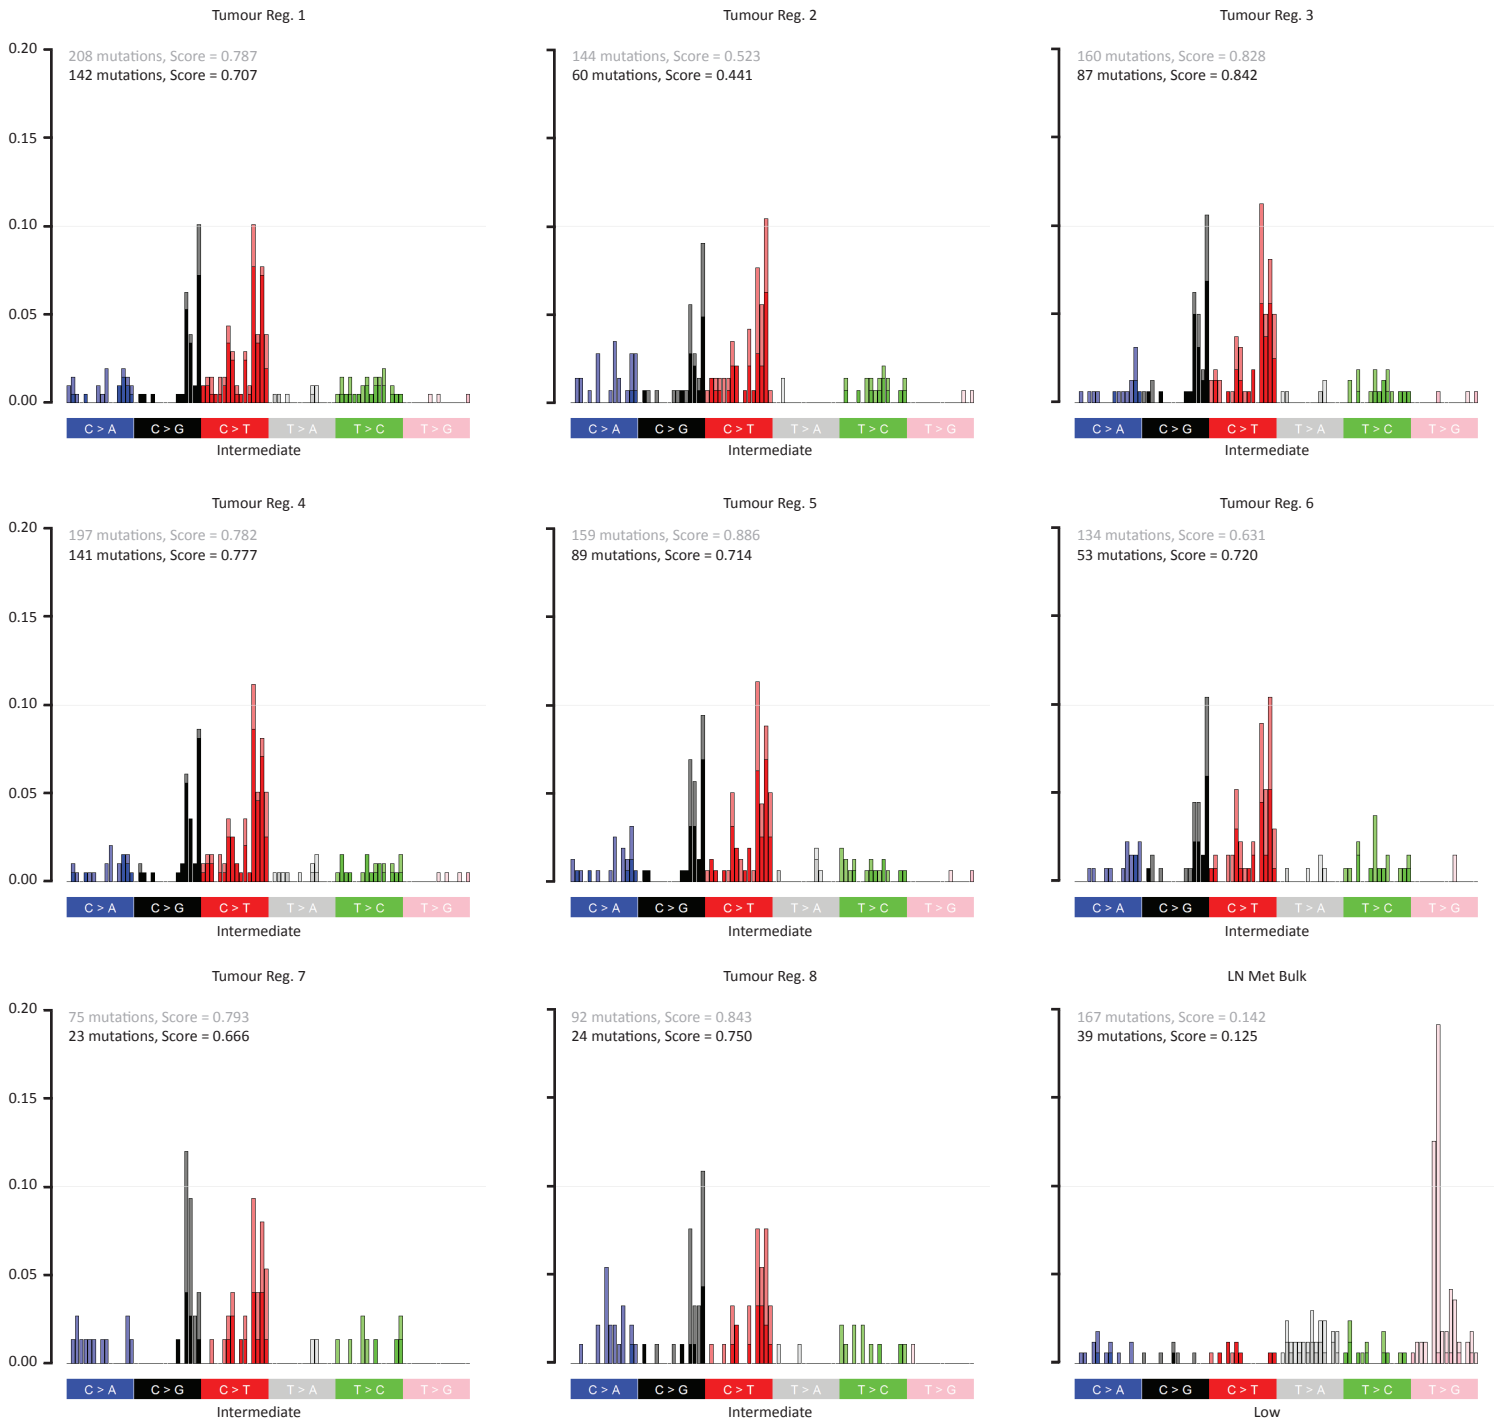

**Supplementary Figure S5 - APOBEC-related mutagenesis.** Bar plots showing nucleotide changes on the x axis and the relative ratio of a given mutation in a given trinucleotide context on the y axis. All mutations (tiers 0-2) were included in the analysis and the bars differentiate between Cat 1 and Cat 2 mutations (dark bars) and addition of Cat 3 mutations (light bars). The number of mutations included in the analysis for the given sample is indicated where black text is including Cat 1 and Cat 2 mutations and light grey is including Cat 3 mutations. The score indicates the strength of the APOBEC signature (TCT or TCA where C is mutated to a T or a G).
