# Supplementary material
Source: PubMed Central journal article supplement (PMC5423216)
Supplement: MOL2-10-1450-s011.pdf [file MOL2-10-1450-s011.pdf]

## Supplementary Figure S8

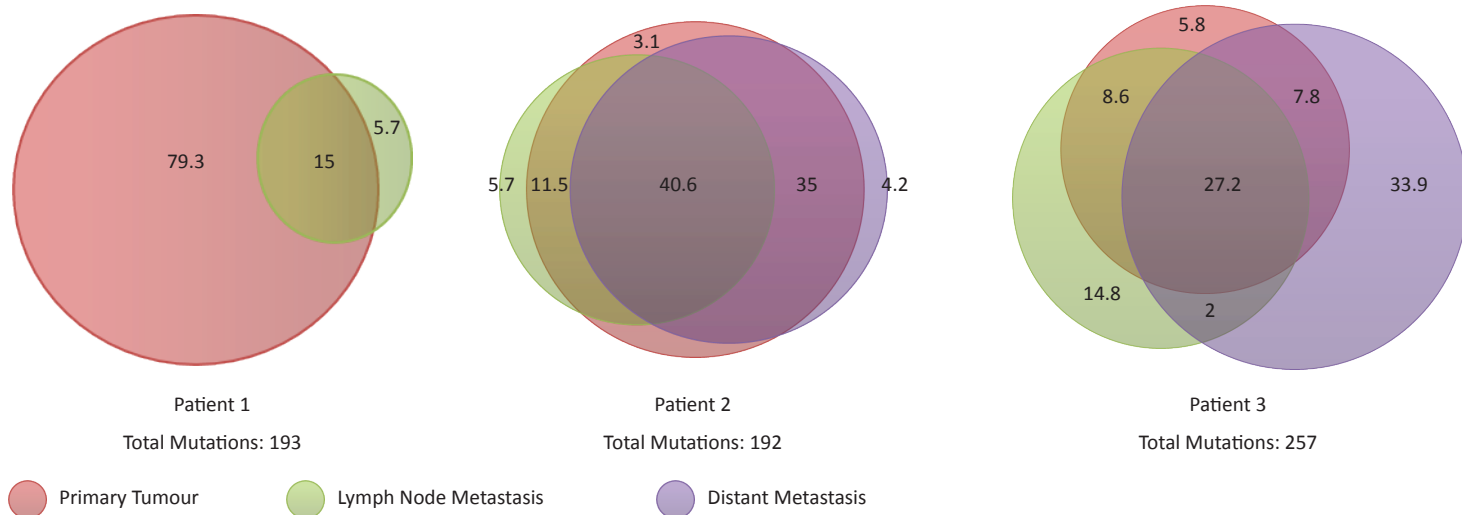

**Supplementary Figure S8** - Mutational similarity between primary tumours and metastatic lesions. Venn diagrams summarizing the number of mutations that is shared between the different sites for the three patients (including tier 0-1 mutations, called with a category score of 1 or 2 in at least one of the samples). Numbers represent the percentage of the total number of mutations for a given patient.
